# Supplementary material for: [(WR)8WKβA]-Doxorubicin Conjugate: A Delivery System to Overcome Multi-Drug Resistance against Doxorubicin
Source: MDPI journal article supplement (doi:10.3390/cells11020301), 2022-01-16
Supplement: s1 [file s1]

## SUPPORTING INFORMATION

### **[(WR)<sub>8</sub>WKβA]-Doxorubicin Conjugate: A Delivery System to Overcome Multi-Drug Resistance against Doxorubicin**

Khalid Zoghebi<sup>1,2</sup>, Hamidreza Montazeri Aliabadi,<sup>1</sup> Rakesh Kumar Tiwari,<sup>1,\*</sup> Keykavous Parang<sup>1,\*</sup>

<sup>1</sup>Center for Targeted Drug Delivery, Department of Biomedical and Pharmaceutical Sciences, Chapman University School of Pharmacy, Harry and Diane Rinker Health Science Campus, Irvine, CA 92618, United States

<sup>2</sup>Department of Pharmaceutical Chemistry, College of Pharmacy, Jazan University, Jazan 82826, Saudi Arabia

\*Corresponding Authors

*Keykavous Parang, Pharm.D., Ph.D.*  
Chapman University School of Pharmacy  
Harry and Diane Rinker Health Science Campus  
#262, 9401 Jeronimo Road  
Irvine, CA 92618, USA  
Tel: (714) 516-5489. Fax: (714) 516-5481  
E-mail: [parang@chapman.edu](mailto:parang@chapman.edu)

*Rakesh K. Tiwari, Ph.D.*  
Chapman University School of Pharmacy  
Harry and Diane Rinker Health Science Campus  
#263, 9401 Jeronimo Road  
Irvine, CA, 92618, U.S.A.  
Tel: (714) 516-5483. Fax: (714) 516-5481  
E-mail: [tiwari@chapman.edu](mailto:tiwari@chapman.edu)

## Table of Contents

|                                                                                                                          | <b>Page</b> |
|--------------------------------------------------------------------------------------------------------------------------|-------------|
| Cytotoxicity assay in heart cells (H9C2) .....                                                                           | S3          |
| Cellular internalization of [(WR) <sub>8</sub> WKβA]-Dox conjugate using Confocal microscopy in heart cells (H9C2) ..... | S4          |
| Stability Results .....                                                                                                  | S5          |
| Hydrolysis Results .....                                                                                                 | S6          |
| Mass spectra for [(WR) <sub>8</sub> WKβA] peptide .....                                                                  | S7          |
| Mass spectra for [(WR) <sub>8</sub> WKβA]-Dox conjugate .....                                                            | S8          |
| HPLC purity profile of [(WR) <sub>8</sub> WKβA]-Dox conjugate .....                                                      | S9          |

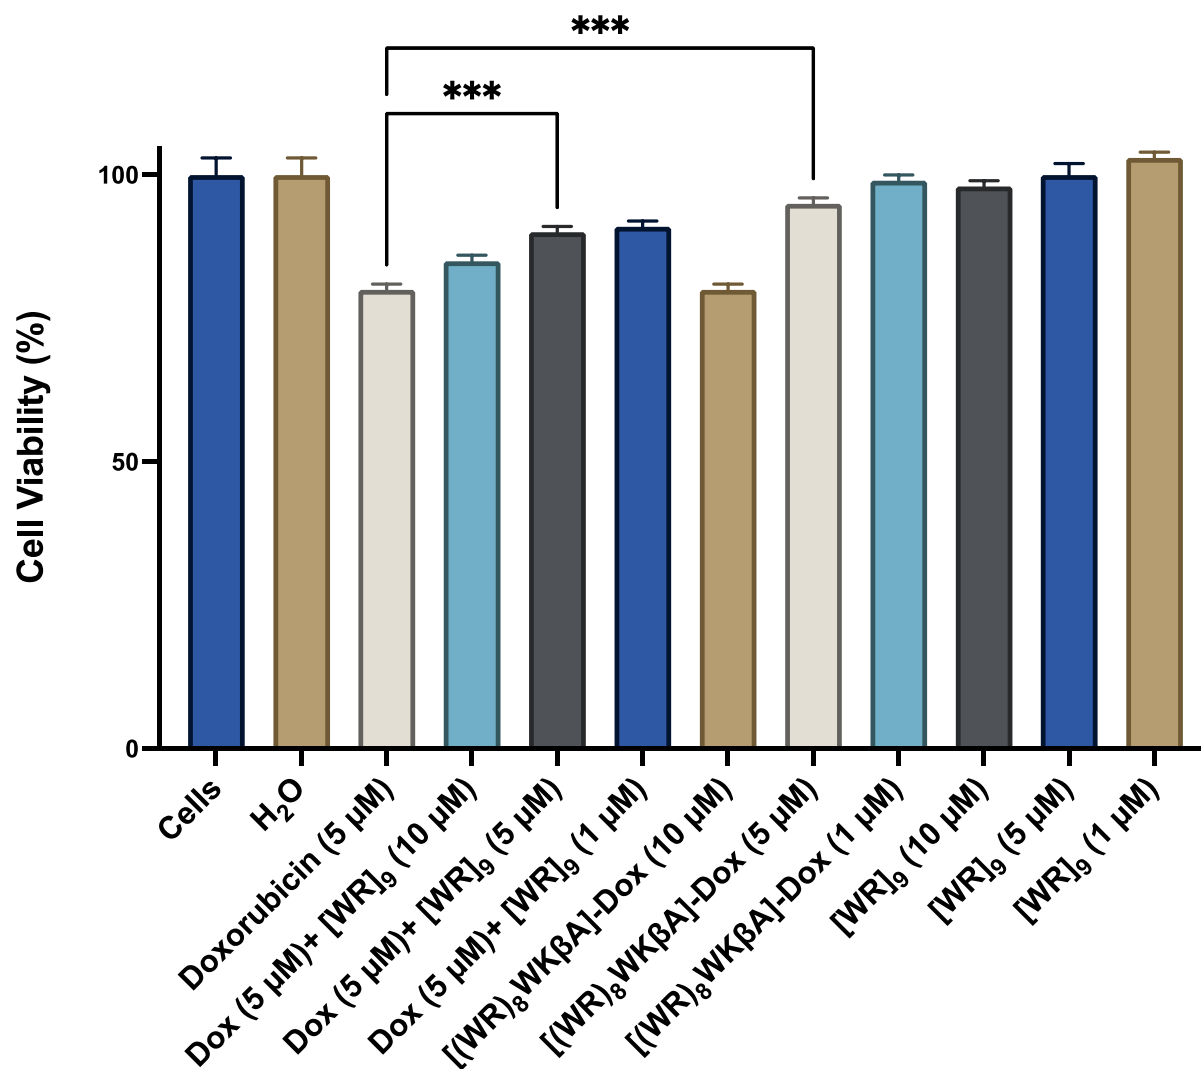

**Figure S1.** Inhibition of heart cells (H9C2) by free Dox (5 μM), [(WR)<sub>8</sub>WKβA]-Dox, [WR]<sub>9</sub> + Dox, and [WR]<sub>9</sub> at 1, 5, and 10 μM. Results are mean ± SD (n = 3). (\*\*\*)p<0.001 treatments at 5 μM vs. Ctrl (Dox) at 5 μM).

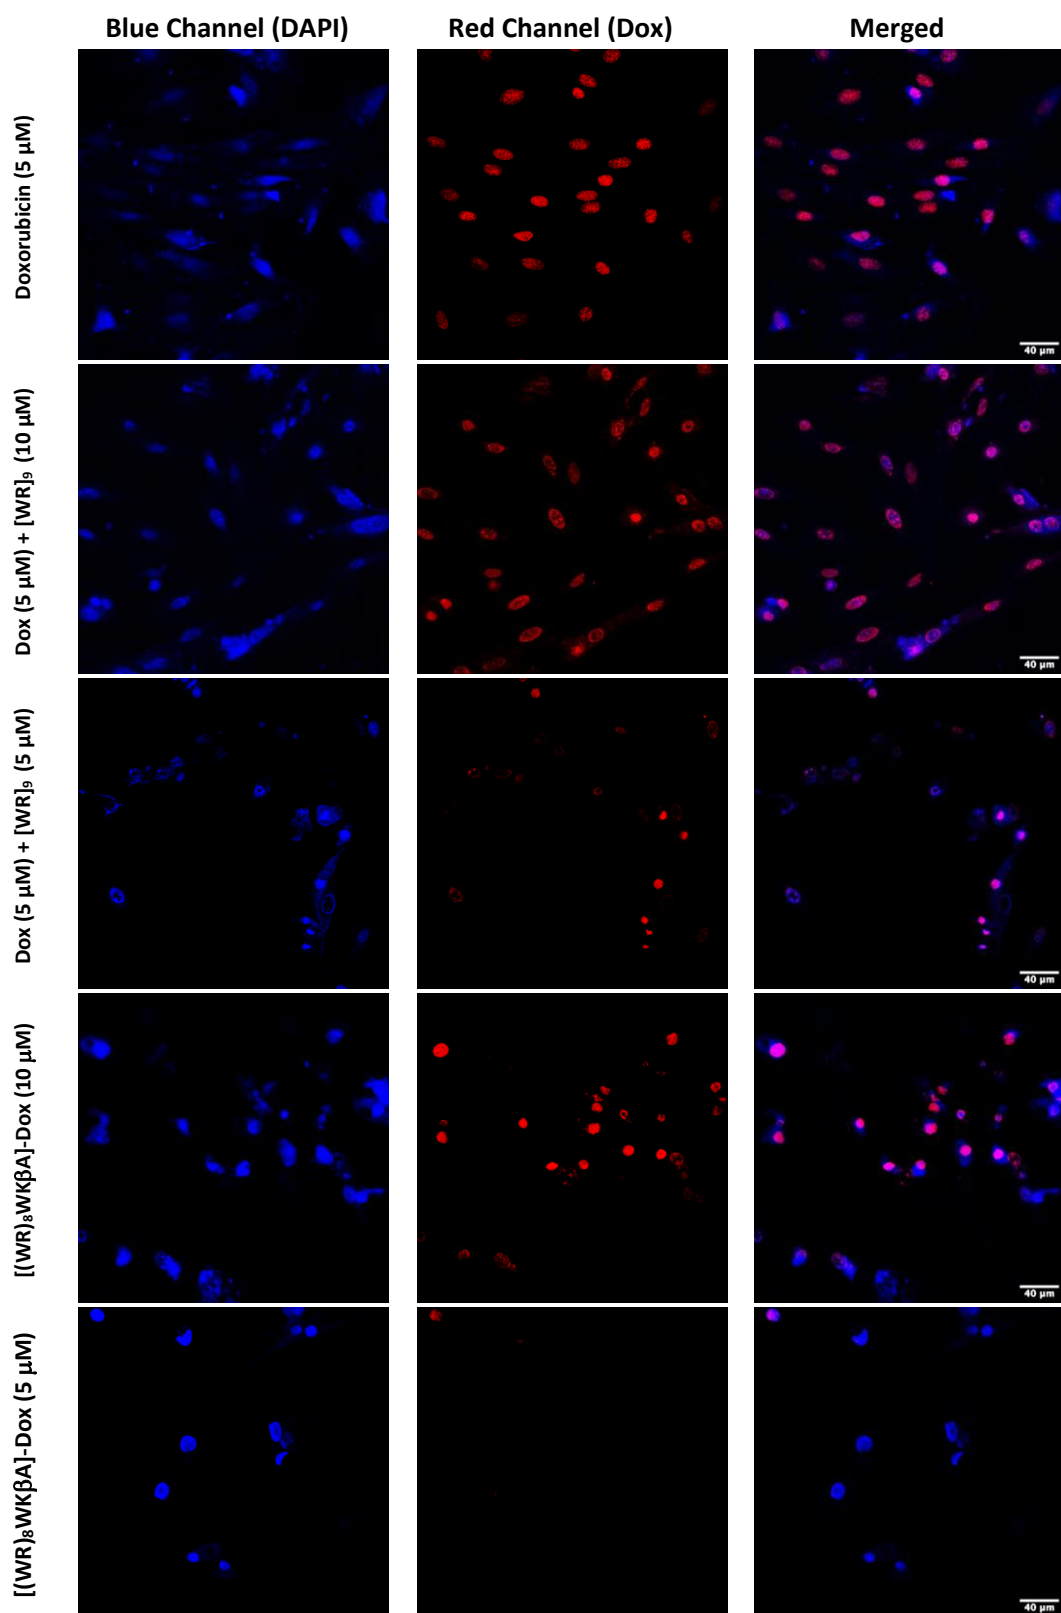

**Figure S2.** Confocal microscopy images of free Dox (5  $\mu$ M), [WR]<sub>9</sub> + Dox (1:1 and 1:2), or [(WR)<sub>8</sub>WK $\beta$ A]-Dox conjugate (5 and 10  $\mu$ M) after 24 h in H9C2 cell line.

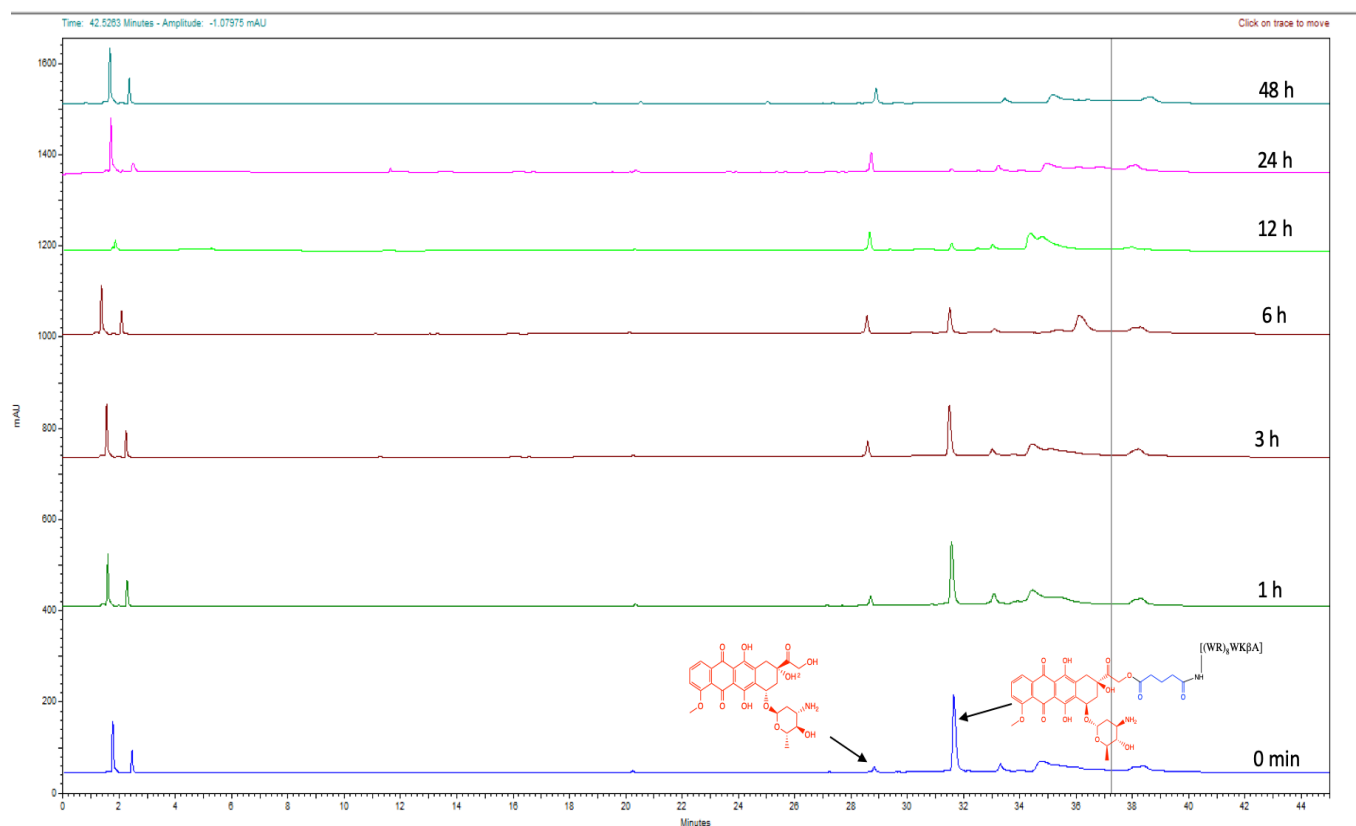

**Figure S3.** Stability of  $[(WR)_8WK\beta A]$ -Dox conjugate at 5  $\mu M$  in human plasma.

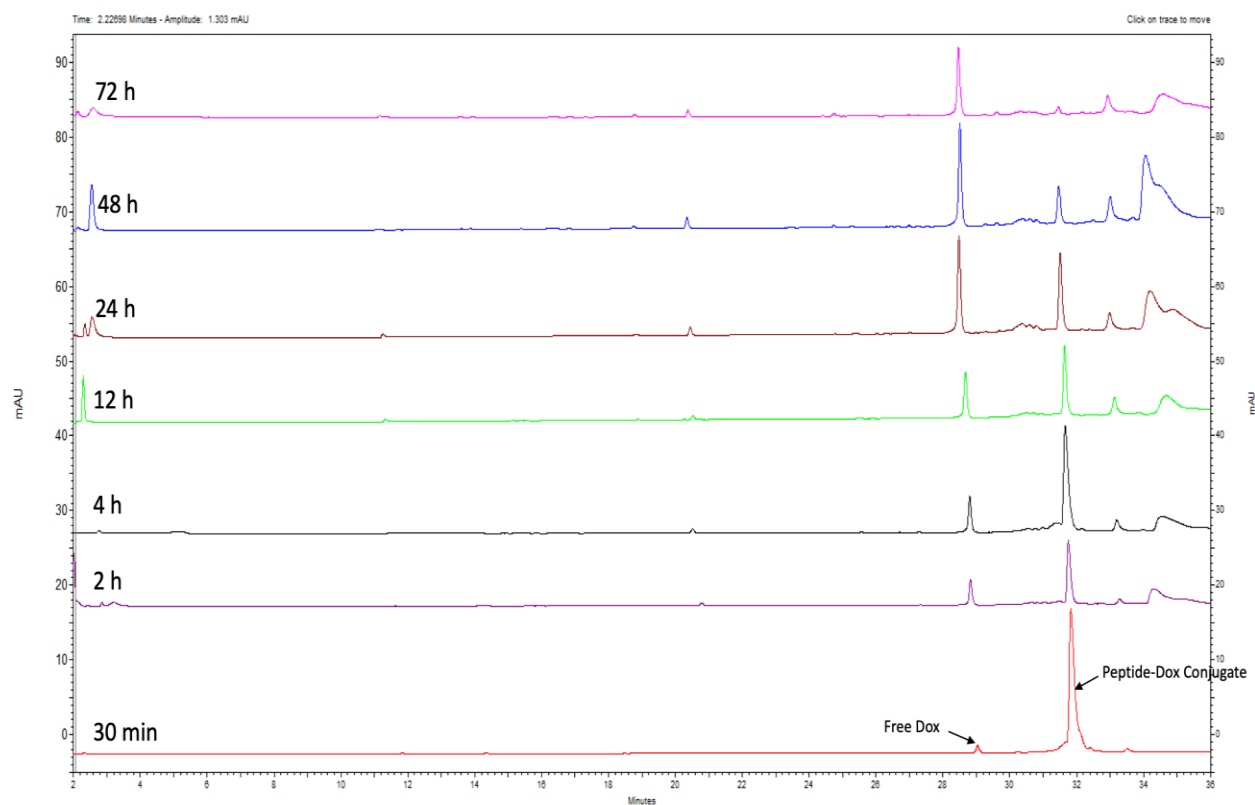

**Figure S4.** Intracellular release of free Dox from  $[(WR)_8WK\beta A]$ -Dox conjugate.

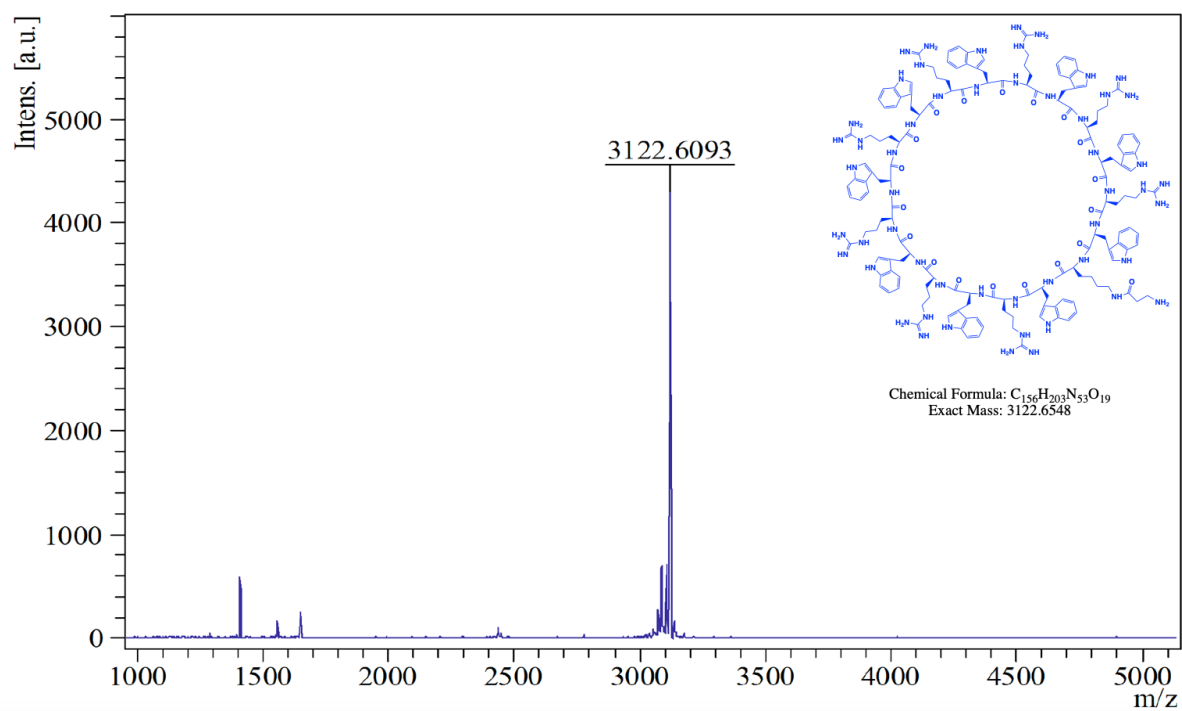

**Figure S5.** Mass spectra of [(WR)<sub>8</sub>WKβA] peptide.

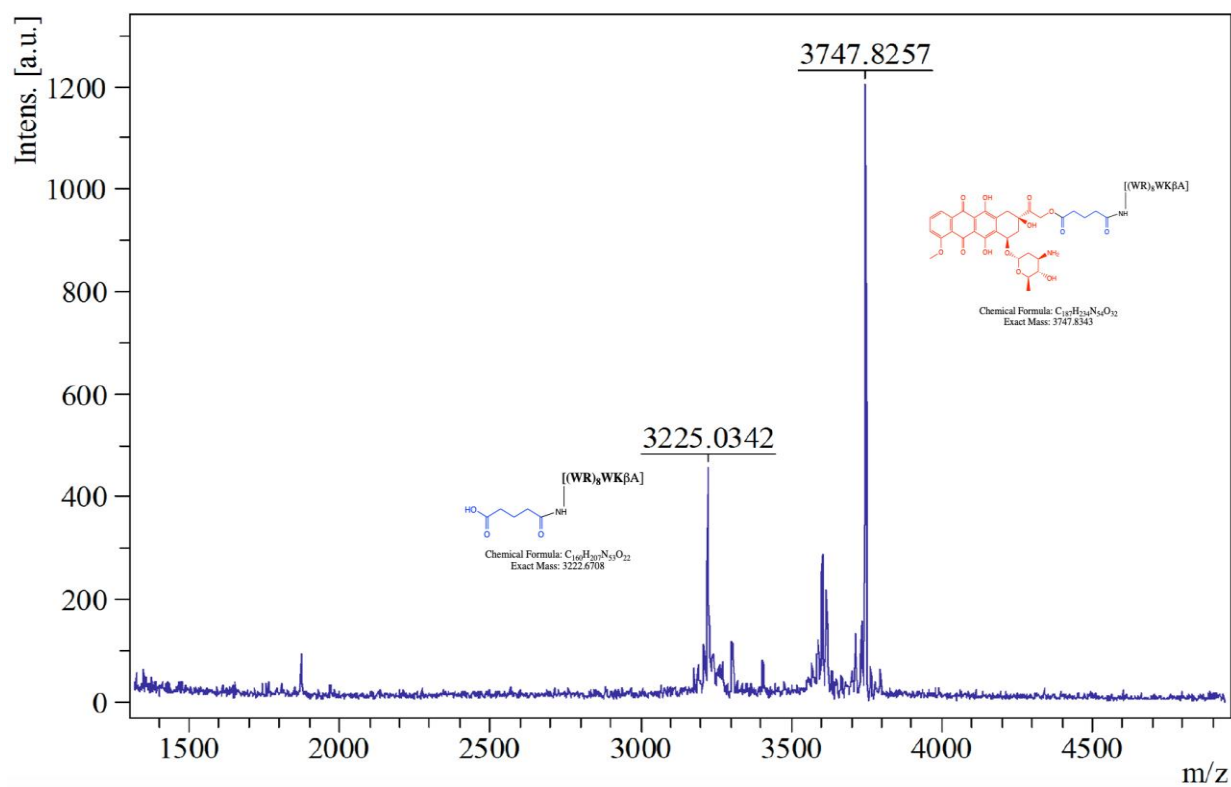

**Figure S6.** Mass spectra of  $[(WR)_8WK\beta A]$ -Dox conjugate.



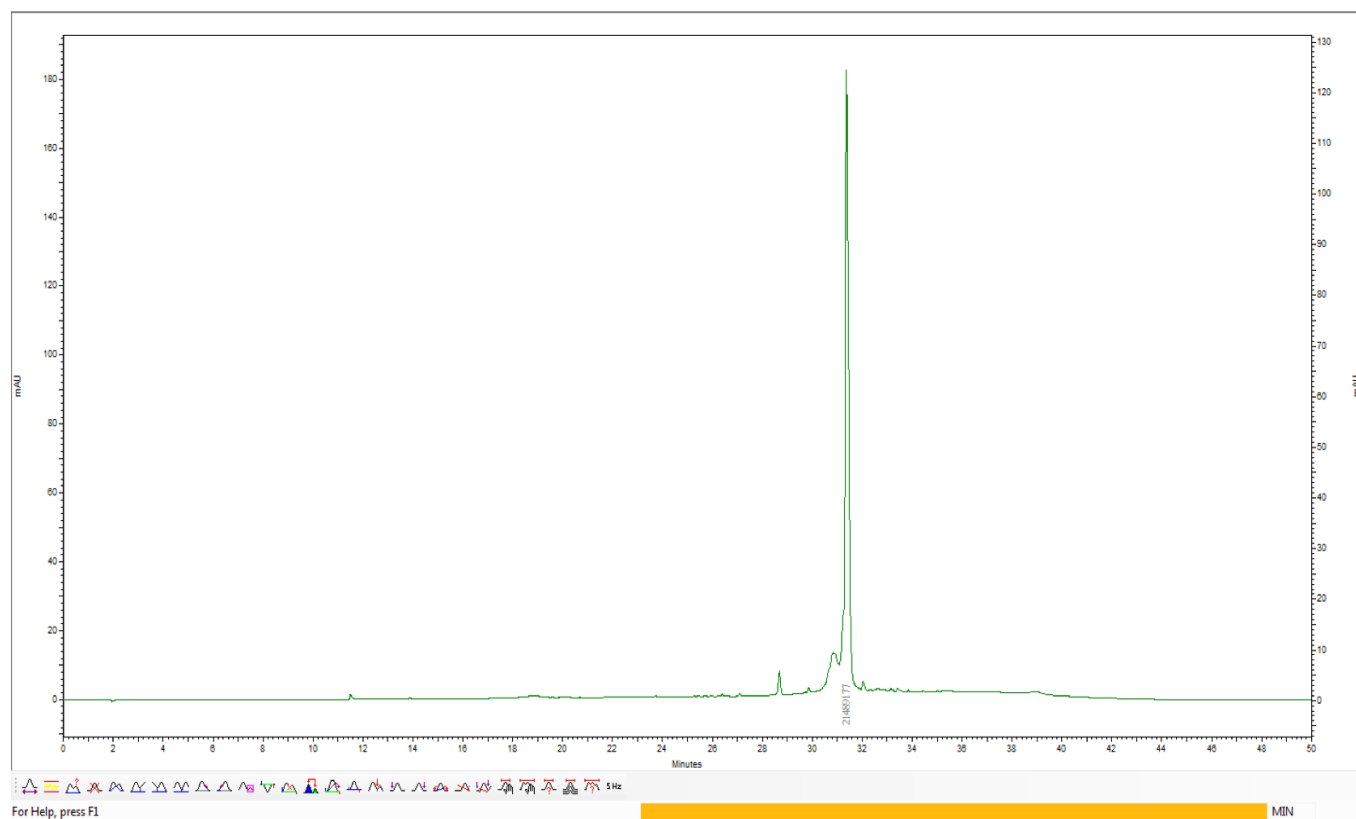

**Figure S7.** Analytical HPLC purity profile of [(WR)<sub>8</sub>WKβA]-Dox conjugate.
